# Supplementary material for: Integrated Analyses Identify Key Molecules and Reveal the Potential Mechanism of miR-182-5p/FOXO1 Axis in Alcoholic Liver Disease
Source: Frontiers journal article supplement (doi:10.3389/fmed.2021.767584), 2021-12-07
Supplement: Data_Sheet_1.zip [file Data_Sheet_1.zip]

## Sheet: Sheet1
Diffierentially expressed analyses
GSE28619				GSE59492
ID	log2FC	adj.P.Val		miRNA	log2FC	adj.P.Value
AADAT	-2.2836	2.02e-08		hsa-miR-127-3p	1.86385	3.85e-05
AASS	-2.12163	0.000168259		hsa-miR-132-3p	1.68192	6.1e-05
ABCG2	-1.54309	1.5e-07		hsa-miR-146a-5p	-1.73654	0.00650853
ACADSB	-1.66862	1.19e-06		hsa-miR-146b-5p	1.78974	3.85e-05
ACSM3	-2.16892	4.13e-06		hsa-miR-148a-3p	-2.80795	2.66e-05
ADH4	-1.58962	2.71e-05		hsa-miR-15a-5p	-1.72731	0.00181314
ADH6	-1.75707	4.41e-05		hsa-miR-182-5p	2.43205	0.0163587
ADRA2A	1.54523	0.00025		hsa-miR-192-3p	-1.51872	0.00288805
ADRB2	-1.90115	3.9e-09		hsa-miR-20b-5p	-1.60564	0.00511595
AJUBA	1.53543	1.25e-06		hsa-miR-214-3p	1.81603	3.09e-06
AKR1B10	7.68021	1.58e-15		hsa-miR-21-5p	2.01167	0.0018658
AKR1C3	1.59406	3.08e-09		hsa-miR-224-3p	1.63064	0.0017358
AKR1D1	-2.99727	1.49e-05		hsa-miR-29c-3p	-1.55795	0.00107655
ALG1	2.28162	1.58e-15		hsa-miR-30e-5p	-2.64487	3.85e-05
ANLN	1.57356	0.000175656		hsa-miR-3178	1.61974	0.00292884
ANO5	1.59069	1.46e-08		hsa-miR-422a	-1.79051	0.00787073
ANXA13	2.77311	1.32e-07		hsa-miR-432-5p	1.58538	0.00349209
ANXA2	2.50144	1.77e-13		hsa-miR-451a	-1.93051	0.015463
ANXA2P2	1.85003	1.8e-10		hsa-miR-4521	2.02333	0.00650853
ANXA3	2.64303	2.87e-05		hsa-miR-455-5p	-1.50423	0.000261728
ANXA4	1.55058	1.52e-08		hsa-miR-503-5p	1.97064	0.00441725
ANXA5	1.71512	3.73e-09
AOC1	-2.98148	9.07e-10
APOA4	1.56652	0.000549212
APOL3	1.75821	1.27e-07
AQP1	2.25845	9.58e-05
ARHGEF26	-1.7278	1.92e-10
ARPC1B	1.62234	2.27e-09
ASB9	-1.51144	3.16e-06
ASPA	-1.72224	7.66e-10
AVPR1A	-1.78451	6.1e-08
AZGP1P1	-1.6704	3.84e-08
B3GAT1	-1.69739	5e-11
BACE2	1.72557	0.000133187
BBOX1	-2.97931	2.37e-05
BCAT1	1.60649	7.37e-08
BCHE	-2.37351	4.48e-05
BDKRB2	1.99361	9.71e-12
BEX2	2.31876	6.87e-08
BICC1	2.18917	8.66e-08
BOLA3	1.51166	1.31e-10
BPGM	1.90213	5.74e-12
C12orf5	2.86806	1.37e-09
C12orf75	2.12141	2.42e-05
C15orf48	3.51474	1.08e-06
C19orf80	1.91968	2.66e-05
C1orf106	2.69682	1.04e-08
C1orf198	1.50426	7.24e-09
C1QTNF1-AS1	1.65554	8.52e-10
C2orf76	1.67543	1.6e-12
C5orf27	-2.84246	8.12e-07
C5orf46	1.98763	1.05e-06
C8orf4	-2.00631	4.34e-11
CA12	1.64707	1.86e-06
CAP2	2.22647	1.16e-09
CAPG	1.79301	5.47e-06
CAPN3	-1.89809	9.9e-07
CCDC102B	2.05471	4.67e-06
CCL18	1.85406	4.62e-05
CCL20	5.50511	1.51e-10
CCNA2	1.67756	0.000110468
CCNB1	1.63985	0.000407074
CD24	3.95909	4.2e-11
CD52	1.76299	0.000107883
CD5L	-2.62522	1.02e-06
CDC20	1.80388	2.57e-06
CDK1	1.69679	1.08e-05
CDKN3	2.00296	0.000114295
CDR2L	1.63823	1.96e-13
CEBPD	-2.03763	9.05e-08
CENPW	1.53356	7.78e-06
CETP	-1.89234	0.000138599
CFHR3	-2.60472	5.7e-05
CFHR4	-1.87762	0.00954649
CH25H	1.58895	0.000315181
CHAD	-1.79235	5.58e-12
CHI3L1	1.70972	0.00262126
CHST4	1.97754	0.000902964
CHST9	2.90436	5.43e-12
CIDEC	2.89223	9.47e-11
CLDN10	1.7901	0.000952054
CLDN2	1.65687	0.000196752
CLDN7	2.31567	3.45e-10
CLEC4M	-3.16272	9.19e-10
CLGN	2.09001	0.000588704
CLIP4	1.67731	2.84e-10
CNDP1	-2.74087	3.72e-07
COL15A1	1.93239	0.000220385
COL1A1	1.98366	1.71e-07
COL1A2	3.5323	5.17e-10
COL3A1	2.72939	5.47e-10
COL4A1	2.74228	3.4e-09
COL4A2	2.40387	1.57e-07
COL5A1	2.09573	5.68e-07
COL5A2	2.05943	1.72e-07
COL6A3	2.06037	2.45e-07
CPS1-IT1	-2.09115	8.5e-05
CRP	1.58582	6.68e-05
CSRNP1	-1.52894	4.65e-05
CTHRC1	3.19791	1.56e-06
CXCL1	3.50732	8.87e-08
CXCL10	1.88227	0.000252541
CXCL2	-1.91468	1.31e-10
CXCL6	5.46866	2.54e-10
CXCL8	3.51866	2.61e-06
CYP1A1	-2.30869	0.000106742
CYP1A2	-3.50423	7.27e-05
CYP26A1	-2.62564	2.88e-09
CYP2C19	-3.63225	3.6e-11
CYP3A43	-1.53102	0.000215827
CYP7A1	-2.802	0.0134277
CYR61	-2.00007	7.84e-07
CYSTM1	1.70999	6.07e-09
DAK	-1.67005	1e-07
DBH-AS1	-1.58049	1.23e-08
DBNDD1	1.58894	2.67e-09
DCDC2	1.79636	5.53e-10
DEFB1	2.69149	3.12e-08
DHRS2	-2.02159	0.000284124
DIRAS3	-1.95719	9.3e-07
DLGAP5	1.67778	0.00112662
DNMT3L	-2.42812	9.05e-10
DTL	1.92036	1.66e-05
DUSP1	-2.29216	5.52e-11
DUSP10	-1.53298	1.03e-08
EEF1A2	3.30089	1.52e-07
EFEMP1	2.88802	3.66e-10
EFHD1	-2.16167	6.49e-07
EGR1	-1.93316	2.17e-06
EGR2	-2.54209	6e-11
ELOVL7	2.35766	1.2e-05
ENPP2	1.76277	0.000159852
EP300-AS1	-1.63616	4e-05
EPCAM	4.31982	1.38e-06
EPDR1	2.0716	1.23e-10
ERICH5	2.55043	1.33e-12
ERMP1	1.5406	1.96e-09
ERRFI1	-1.72493	2.79e-07
ETNK2	-1.50037	0.000721916
F13A1	2.23336	5.91e-06
F2RL1	2.0682	4.93e-09
FABP4	2.5579	1.8e-08
FABP5	2.92183	3.01e-06
FAIM	2.32929	1.15e-10
FAM150B	1.7136	0.000987299
FAM151A	-2.90145	5.59e-10
FAM169A	2.62963	2.17e-09
FAM213B	1.64311	1.57e-09
FAM3B	2.35354	0.000652464
FAP	1.71206	8.96e-07
FAT1	3.12251	2.81e-11
FBLN5	1.61414	1.56e-05
FBXO6	1.7068	1.51e-08
FCAMR	1.94427	0.00361862
FCGR1B	2.08018	3.15e-05
FGF13	2.7875	4.17e-07
FGF21	1.72535	0.000795807
FKBP1B	1.70165	7.32e-05
FNDC1	1.74561	0.000953612
FOLH1	-1.5271	4.87e-11
FOLH1B	-1.82634	5.26e-05
FOS	-5.59191	2.7e-14
FOXO1	-3.97299	2.47e-12
FST	-1.95504	6.27e-07
FXYD1	-1.54343	1.45e-07
FZD6	1.72349	1.56e-07
G0S2	1.5369	8.36e-05
G6PC	-1.92215	7.1e-05
GADD45G	-2.78763	1.25e-11
GAL3ST4	1.80234	1.81e-12
GAS2L3	1.73621	5.33e-08
GLIS3	1.50409	1.77e-06
GLYAT	-1.82376	2.41e-05
GMNN	1.64059	3.9e-09
GNMT	-3.69332	7.14e-05
GOLM1	1.95183	7.01e-13
GPNMB	2.15549	3.5e-05
GPR125	-2.62452	1.07e-11
GPR34	2.12643	2.69e-05
GPR64	2.20451	4.83e-05
GPR88	-3.13002	2.4e-10
GPX2	2.194	4.15e-09
GPX8	2.02327	1.21e-08
GSTA3	-1.88993	6.79e-07
HAO2	-2.20692	5.47e-05
HAPLN4	-1.77291	1.33e-12
HEXB	1.54635	2.38e-09
HGF	1.62775	1.64e-10
HGFAC	-1.52538	1.95e-05
HIST1H2AC	1.72237	7.4e-07
HIST1H2BC	1.73871	1.44e-06
HKDC1	2.68476	1.44e-16
HMMR	1.86479	0.000417408
HSPA2	1.78194	1.87e-05
HSPB8	1.77823	1.14e-09
HTR2B	1.95308	3.23e-06
HTRA1	1.60848	1.43e-09
IDO2	-3.36014	1.2e-07
IGJ	-1.84472	0.000656068
IL10	-1.59424	1.93e-12
IL13RA2	-1.76927	0.00195218
IL18	2.01876	2.13e-05
IL1RAP	-1.78215	1.42e-06
IL32	3.55363	1.12e-10
IL6R	-1.75419	4.06e-09
INSIG1	-1.70771	0.000771362
IRS2	-1.74638	5.12e-08
ITGA2	1.82391	3.82e-07
ITGA6	2.32564	1e-11
ITGAV	1.94299	9.19e-10
ITGBL1	1.55205	2.47e-06
KANK4	-1.57141	4.6e-09
KCNN2	-5.02075	4.9e-12
KCNS3	1.54133	5.15e-05
KDELR3	2.23812	4.64e-11
KIAA1522	1.51212	3.6e-11
KIF20A	1.98053	8.29e-05
KLF6	-1.71017	1.29e-11
KPNA2	1.88496	3.43e-07
KRT18	2.20151	7.73e-11
KRT222	1.9307	4.99e-07
KRT23	5.56899	1.38e-10
KRT8	2.28779	5e-11
LAMA2	1.61448	1.06e-08
LAMB1	1.53654	4.36e-06
LAMB3	1.69832	5.5e-08
LCN2	4.05836	1.12e-07
LEPR	-1.53579	0.000277639
LGALS4	2.63887	9.88e-08
LGSN	-2.90469	2.21e-12
LINC00844	-2.25427	0.00255672
LINC00969	-1.84807	1.23e-10
LINC01018	-2.23337	1.2e-08
LINC01093	-3.61169	5.51e-06
LINC01127	-1.67337	3.4e-05
LINC01279	1.84504	0.000885614
LOC100505915	-1.95797	3.49e-11
LOC101927331	-2.09823	0.00040372
LOC101929475	2.43865	1.25e-07
LOC102723845	-1.86271	8.33e-07
LOC157273	-1.99028	6.1e-08
LOC440354 /// SMG1P5	-1.60902	0.000354727
LOXL1	1.76685	1.85e-05
LOXL4	1.8866	6.81e-12
LPA	-1.77225	0.000888123
LPL	2.49026	0.000179468
LSP1	1.63111	4.08e-08
LTBP2	1.82692	1.44e-07
LUM	2.93387	1.7e-12
LXN	2.83705	2.21e-06
LYVE1	-1.52523	0.00157099
LYZ	1.8038	0.0114342
MAP1B	1.59489	7.4e-09
MAP2K1	-1.5159	2.66e-09
MELK	1.63152	6.21e-06
MFSD6	1.55338	8.98e-09
MIR34A	1.65055	3.08e-13
MLLT11	2.13796	0.000131827
MME	-2.4171	8.14e-08
MMP7	3.86469	2.71e-08
MORC4	1.99164	1.72e-07
MOSPD1	1.60422	8e-10
MOXD1	1.77043	1.56e-09
MROH2A	-2.31723	1.06e-08
MT1F	-1.66897	9.69e-05
MT1G	-1.74098	1.18e-07
MT1H	-1.6492	3.33e-06
MT1M	-2.93476	5.71e-05
MTCL1	2.49667	1.05e-08
MUM1L1	1.78347	2.59e-06
NCEH1	1.68223	4.82e-05
NDC80	1.6792	0.000530279
NEURL3	1.66189	9.88e-10
NFIL3	-2.10449	3.65e-07
NPY1R	-1.71039	3.08e-05
NQO1	3.08968	1.99e-06
NR4A2	-4.37114	3.13e-10
NUSAP1	1.83164	5.34e-05
OAT	-2.79244	5.42e-08
ODC1	1.505	1.82e-08
OTUD6B	1.55046	1.33e-08
PBK	2.6015	0.000108068
PCDH17	2.18471	4.53e-08
PCOLCE2	-3.69973	1.89e-10
PDGFA	1.81125	1.05e-09
PDK4	-2.57536	3.73e-07
PDZK1IP1	4.02684	9.78e-08
PGLYRP2	-1.50032	0.00313317
PHLDA3	1.52018	3.08e-11
PLA2G7	2.52814	2.84e-06
PLGLB2	-1.64379	4.11e-07
PLP2	2.34065	1.28e-08
PMEPA1	1.68458	4.06e-07
PODXL	1.77399	2.95e-08
PPAP2C	2.28392	3.82e-07
PPBP	2.0182	0.00251468
PPIC	1.80554	2.34e-10
PPP1R1A	-3.22945	1.95e-12
PRC1	1.66921	0.000376467
PRO2852	-2.0738	1.81e-08
PROCR	1.94608	1.12e-10
PROM1	2.34305	0.000185419
PRR15L	1.55516	0.000102044
PRSS3	1.88234	8.31e-08
PSAT1	-1.60241	1.03e-05
PSMD14	1.52083	2.61e-10
PTGFRN	1.73488	1.76e-10
PTTG1	1.84823	0.00010686
PZP	-2.02841	6.5e-05
RAB25	2.09585	0.000229402
RAB3B	1.66918	2.73e-06
RACGAP1	2.15111	6.41e-07
RAD51AP1	1.83991	6.8e-06
RAPH1	-1.68378	1.01e-06
RARRES1	2.27104	3.48e-08
RCL1	-1.6017	3.33e-09
RCN2	1.51349	5.4e-12
RFC4	1.79076	9.95e-09
RGS1	-1.88497	4.05e-09
RGS4	2.2564	7.46e-06
RMI2	1.56047	2.76e-10
RNASE2	1.53972	3.1e-08
ROBO1	1.60528	6.46e-07
RORC	-1.78437	6.04e-10
RPL39L	1.54267	2.33e-09
RPS16P5	-2.22444	1.42e-11
RRM2	3.30049	9.27e-06
S100A11	1.91771	1.98e-06
S100P	3.00889	0.00244288
SCG5	-1.73121	1.06e-05
SDS	-2.61151	5.71e-05
SERPINE1	-1.98515	9.11e-06
SGK223	1.50024	8.67e-07
SIRT1	-1.50605	7.17e-08
SLC12A2	2.84657	1.45e-08
SLC16A10	-2.45561	3.49e-13
SLC16A4	-1.72777	3.81e-06
SLC19A2	-2.29169	8.6e-10
SLC22A15	2.84059	1.35e-10
SLC25A25	-2.36642	5.72e-08
SLC26A2	1.53455	8.18e-10
SLC34A2	1.70832	9.57e-13
SLC35C1	2.17367	6.56e-09
SLC38A1	1.91286	8.61e-09
SLC39A10	1.63775	1.15e-08
SLC44A3	2.88346	7.44e-07
SLC47A1	-1.52602	5.66e-07
SLC51A	2.03131	3.4e-09
SLC51B	3.84334	2.66e-07
SLC6A1	-1.7016	5.7e-06
SLC6A16	-1.61716	3.07e-10
SLCO1B3	-2.65181	0.000112103
SLCO4C1	-1.63055	3.29e-08
SLPI	1.70329	5.69e-07
SMIM24	1.54064	0.0208745
SOCS2	-1.88937	1.88e-06
SORD	-1.54204	9.59e-07
SORL1	-1.55664	1.51e-09
SORT1	1.5454	4.73e-09
SOX4	1.56063	2.51e-10
SOX9	3.12781	3.76e-11
SPA17	2.39155	2.72e-10
SPDL1	1.5598	3.79e-10
SPINK1	5.35174	6.54e-07
SPINT2	1.68618	0.000336517
SPP1	3.22641	2.91e-08
SRD5A2	-2.41527	2.56e-07
SSUH2	1.76752	3.57e-06
STMN2	3.87277	5.18e-09
SUCO	1.57888	5.28e-08
SULF2	1.58326	1.74e-06
SULT1C2	1.6027	1.86e-05
SULT1E1	-1.58775	0.00215954
SYBU	-1.85813	6.32e-10
TAGLN2	1.64557	7.22e-09
TES	1.68555	7.57e-13
TGFBI	1.60658	1.18e-05
THBS2	3.65747	1.22e-10
THRSP	-1.99956	0.0013923
TIMP1	2.7728	5.59e-10
TK1	1.548	3.67e-06
TLCD1	1.5398	4.79e-10
TMC4	1.6893	0.00116958
TMEM139	1.75564	1.06e-07
TMEM200A	2.11116	1.31e-05
TMEM45B	2.64446	2.3e-06
TMEM54	1.8026	6.39e-10
TMEM92	1.56136	9.11e-11
TNFAIP8	1.57862	6.86e-08
TNFRSF12A	2.3591	4.3e-09
TOP2A	1.58388	7.62e-06
TP53I3	2.65842	4.2e-11
TPX2	1.83519	1.63e-05
TREM2	1.99142	8.89e-07
TRIM6	1.67677	1.2e-06
TSPAN15	1.67687	5.05e-09
TUBA1A	1.71121	3.69e-07
TUBA1C	1.72888	1.68e-10
TUBB4B	1.73747	9.19e-10
TYMS	1.50325	2.95e-06
UBE2C	1.92613	1.18e-06
UBE2Q2	1.83457	3.92e-08
UHRF1	1.52034	7.19e-06
VCAN	3.2345	2.65e-07
VIPR1	-1.55689	6.03e-08
VSIG10L	1.82542	5.59e-07
VSIG2	1.62513	7.27e-08
VTCN1	2.28181	1.6e-05
WBP5	1.77746	2.41e-08
WLS	1.53427	7.37e-08
ZG16	-1.97784	0.000117876
ZGPAT	-1.78929	0.000751667
ZNF331	-1.51042	0.00138739
ZNF385B	-1.96434	2.9e-05
ZNF468	1.64337	5.45e-08
ZWINT	1.74728	0.000252838
